# 1 **Interactive effects of shifting body size and feeding**

## 2 **adaptation drive interaction strengths of protist**

### 3 **predators under warming**

#### 4 **Temperature adaptation of feeding**

5 K.E.Fussmann <sup>1,2</sup>, B. Rosenbaum <sup>2,3</sup>, U.Brose <sup>2,3</sup>, B.C.Rall <sup>2,3</sup>

6 <sup>1</sup> J.F. Blumenbach Institute of Zoology and Anthropology, University of Göttingen, Berliner  
7 Str. 28, 37073 Göttingen, Germany

8 <sup>2</sup> German Centre for Integrative Biodiversity Research (iDiv), Halle-Jena-Leipzig, Deutscher  
9 Platz 5e, 04103 Leipzig, Germany

10 <sup>3</sup> Institute of Ecology, Friedrich Schiller University Jena, Dornburger-Str. 159, 07743 Jena,  
11 Germany

12 Corresponding author: Katarina E. Fussmann

13 telephone: +49 341 9733195

14 email: [katarina.fussmann@biologie.uni-goettingen.de](mailto:katarina.fussmann@biologie.uni-goettingen.de)

15 Keywords: climate change, functional response, body size, temperature adaptation, activation  
16 energies, microcosm experiments, predator-prey, interaction strength, Bayesian statistics

17 Paper type: Primary Research

# Abstract

Global change is heating up ecosystems fuelling biodiversity loss and species extinctions. High-trophic-level predators are especially prone to extinction due to an energetic mismatch between increasing feeding rates and metabolism with warming. Different adaptation mechanisms such as decreasing body size to reduce energy requirements (morphological response) as well as direct effects of adaptation to feeding parameters (physiological response) have been proposed to overcome this problem. Here, we use protist-bacteria microcosm experiments to show how those adaptations may have the potential to buffer the impact of warming on predator-prey interactions. After adapting the ciliate predator *Tetrahymena pyriformis* to three different temperatures (15°C, 20°C and 25°C) for approximately 20 generations we conducted functional response experiments on bacterial prey along an experimental temperature gradient (15°C, 20°C and 25°C). We found an increase of maximum feeding rates and half-saturation densities with rising experimental temperatures. Adaptation temperature had on average slightly negative effects on maximum feeding rates, but maximum feeding rates increased more strongly with rising experimental temperature in warm adapted predators than in cold adapted predators. There was no effect of adaptation temperature on half-saturation densities characterising foraging efficiency. Besides the mixed response in functional response parameters, predators also adapted by decreasing body size. As smaller predators need less energy to fulfil their energetic demands, maximum feeding rates relative to the energetic demands increased slightly with increased adaptation temperature. Accordingly, predators adapted to 25°C showed the highest feeding rates at 25°C experimental temperature, while predators adapted to 15°C showed the highest maximum feeding rate at 15°C. Therefore, adaptation to different temperatures potentially avoids an energetic mismatch with warming. Especially a shift in body size with warming

- 42 additionally to an adaptation of physiological parameters potentially helps to maintain a
- 43 positive energy balance and prevent predator extinction with rising temperatures.

## Introduction

Global change has a negative impact on biodiversity, up to a point where scientists consider the world to be on the verge of the sixth wave of mass extinction (Wake & Vredenburg, 2008; Pereira *et al.*, 2010; Barnosky *et al.*, 2011). Changing temperatures are one major driver of global change and are expected to have a global impact (MEA, 2005). Climate reports predict a minimum increase of 1.5°C in surface temperature by the end of the century and it is deemed extremely likely that anthropogenic causes (Cook *et al.*, 2013) have led to the warmest 30 year period of the last 1,400 years (IPCC, 2014). Temperature directly affects development, survival, range and abundance of species (Bale *et al.*, 2002) and has a strong effect on species interactions (Montoya & Raffaelli, 2010) as well as on the structure and dynamics of species communities (Brose *et al.*, 2012). Further, increasing temperatures in aquatic as well as terrestrial ecosystems have been linked to vast biodiversity losses during extinction waves in earlier earth periods (Gómez *et al.*, 2008; Mayhew *et al.*, 2008; Joachimski *et al.*, 2012). Despite this negative impact of high temperatures on taxonomic richness, previous periods of warming have also been associated with high speciation rates since increasing temperatures can trigger rapid evolution (Gillooly *et al.*, 2005; Geerts *et al.*, 2015) and create niche openings by eliminating species previously occupying a certain habitat or resource (Mayhew *et al.*, 2008). This leads to the question whether adaptation and evolution pose a feasible escape from warming induced extinction.

Species' extinctions and therewith biodiversity strongly depend on the stability of the ecosystems they are embedded in (May, 1972; McCann, 2000). Stability furthermore depends on the interaction strengths between species. High interaction strengths decreases the population stability leading to extinction caused by high population cycles, and too low an

interaction strength may lead to extinction of predators due to starvation (Rall *et al.*, 2010).

The functional response is one of the oldest and most established tools to quantify the strength of these interactions and describe species-species feeding interactions in ecology (Holling, 1959; Jeschke *et al.*, 2002). In this framework, the feeding rate,  $F$ , of a predator depends on the density of its resource. The functional response, as described by Real (1977) includes a non-linear feeding rate, which determines the maximum feeding,  $f$ , when prey is abundant. At lower prey densities the functional response curve is characterised by the predator's foraging efficiency. Mathematically this is described by half-saturation density,  $\eta$ , the prey population density at which half of the maximum feeding rate is reached. (Figure 1). These parameters can be used to evaluate interspecies interaction strength which have been a main predictor of ecosystem stability (Berlow *et al.*, 2009).

To investigate the effects of warming on interaction strength, previous studies have used the principles of the Metabolic Theory of Ecology (MTE) (Gillooly *et al.*, 2001; Brown *et al.*, 2004) which is quantified as activation energies measured in electron Volt [eV] according to the Arrhenius equation (Arrhenius, 1889). The Arrhenius equation, originally used to describe chemical reactions and enzyme kinetics, has become a mechanistic model for biological rates in ectotherm organisms (Gillooly *et al.*, 2001; Brown *et al.*, 2004; Savage *et al.*, 2004). The MTE argues that all biological rates as well as higher order patterns such as density distributions scale with temperature. Therefore, the parameters of the functional response, determining interaction strength should follow the same principles (Vasseur & McCann, 2005; Fussmann *et al.*, 2014): maximum feeding rates are often assumed to scale with temperature in the same manner as metabolic demands with an activation energy ranging from 0.6 to 0.7 eV across different taxa (Vasseur & McCann, 2005). This is corroborated by empirical data of ciliates, flagellates and other microfauna showing even higher activation

energies for maximum feeding rates of 0.772 eV (Hansen *et al.*, 1997; Vasseur & McCann, 2005). However, a broader analysis of predators from different ecosystems revealed that maximum feeding,  $f$ , scales with an activation energy of roughly 0.3 to 0.4 eV (Rall *et al.*, 2012; Fussmann *et al.*, 2014). This leads to a mismatch where, under warming, metabolism increases faster than maximum feeding. As a result, predators cannot meet their metabolic demands and run the risk of starvation even if they are surrounded by prey (Vucic-Pestic *et al.*, 2011; Fussmann *et al.*, 2014). The half-saturation density,  $\eta$ , can be influenced by a variety of parameters such as encounter rate, mobility of prey and predator, and search efficiency. Most significantly, mobility of prey and predator and therefore encounter rates and search efficiencies are influenced by warming (Sentis *et al.*, 2012; Dell *et al.*, 2014). Since the reaction of prey as well as predator to changing temperatures can be highly variable in both, general tendency and intensity, this results in a high variability of activation energies for half-saturation density, ranging from positive to negative relationships with warming, being on average neutral (Fussmann *et al.*, 2014). Constant half-saturation densities can be mechanistically explained by a simultaneous increase of feeding at low densities (the “rate of successful attacks” (Holling, 1959), often referred to as attack rate, capture rate or maximum clearance rate) and maximum feeding rate with increasing temperatures. At high temperatures, natural systems show lower prey population densities due to reduced resource availability (Brown *et al.*, 2004; Meehan, 2006; Fussmann *et al.*, 2014). If predator abundances are low in natural systems and predators are not able to increase their foraging efficiency under those conditions (i.e. decrease of half-saturation densities) feeding rates eventually decrease. These mismatches can lead to the loss of higher trophic levels due to starvation (Binzer *et al.*, 2012; Fussmann *et al.*, 2014) and decreases in biodiversity due to warming (Binzer *et al.*, 2016).

115 However, other mechanisms, for example adaptation to higher temperatures, may be able to  
 116 counteract starvation due to energetic mismatch (Angilletta Jr., 2009; Chevin *et al.*, 2010;  
 117 Somero, 2010). In studies where adaptation may have buffered the physiological impacts of  
 118 warming, temperature had hardly any effect on the overall fitness of a population (Chown *et*  
 119 *al.*, 2010). Adaptation in predator-prey systems is often studied from a prey's perspective  
 120 (McPeck *et al.*, 1996; Yoshida *et al.*, 2003; Abrams & Walters, 2010) but rarely from a  
 121 predator's (Sentis *et al.*, 2015), despite them being most affected by temperature changes  
 122 (Rall *et al.*, 2010; Binzer *et al.*, 2012; Fussmann *et al.*, 2014). Given that predator energy  
 123 efficiency is a major determinant of population stability (Vasseur & McCann, 2005; Rall *et*  
 124 *al.*, 2010), an adaptation of either metabolism or functional response parameters or both could  
 125 be crucial. Temperature adaptation, however, is often investigated on short time scales (Sentis  
 126 *et al.*, 2015) leading to concerns that the time frame of temperature changes exceeds  
 127 adaptation rates (Quintero & Wiens, 2013). Generally, short-term studies tend to  
 128 underestimate a species' capability of adapting to climate change (Leuzinger *et al.*, 2011). In a  
 129 short-term study focussing on acclimation within one generation, the physiological  
 130 temperature effect on feeding rates proved crucial since metabolic rates and body size were  
 131 less affected by acclimation temperature (Sentis *et al.*, 2015). However, metabolism and  
 132 functional response parameters are not only influenced by temperature but also by body size  
 133 (Vucic-Pestic *et al.*, 2011; Ott *et al.*, 2012; Rall *et al.*, 2012; Kalinkat *et al.*, 2013). However,  
 134 body size itself is influenced by temperature (Atkinson *et al.*, 2003; Figure 2). Globally,  
 135 species in warmer regions tend to have smaller average body sizes than species in colder  
 136 ecosystems (Bergmann, 1847), this trend was also documented in warming studies  
 137 investigating different size spectra of local freshwater communities (Daufresne *et al.*, 2009;  
 138 Yvon-Durocher *et al.*, 2011). Further, body size has been shown to have a strong effect on

interaction strengths through allometric scaling (Brose, 2010). Smaller body sizes require less energy to maintain metabolism and population growth (Brown *et al.*, 2004) leading to reduced maximum feeding rates while not affecting the half-saturation densities (Hansen *et al.*, 1997). The half-saturation density ( $\eta = 1/(T_h a)$ ) can be calculated as the inverse of the product of handling time ( $T_h = 1/f$ ) and attack rate ( $a = f/\eta$ ). Consequently, if maximum feeding rates and attack rates scale similarly with body size, the effect on half-saturation density is equalled out ( $\eta = f/a$ ) (Rall *et al.*, 2012). As a result of constant half-saturation density, maximum feeding rates are constant across the entire prey density gradient (Figure 1).

Here, we explored how interactive effects of direct temperature adaptation of feeding rates and indirect effects on feeding rates through temperature induced changes in body size influence functional response parameters. We designed a microcosm experiment with short generation times (Callahan *et al.*, 2008) to understand how adaptation to different temperatures over 20 generations influences feeding behaviour. We investigated whether adaptation to temperature enables predator populations to avoid extinction caused by crossing the threshold where metabolic demands overtake the energy intake through feeding. (1) We expect body sizes of warm adapted *Tetrahymena* to decrease within 20 generations compared to predators adapted to colder temperatures (Figure 2a). (2) Half-saturation densities should not be affected by increasing experimental temperature. If *Tetrahymena* adapts both, attack rates and maximum feeding rates simultaneously, we expect no change in half-saturation density with adaptation temperature (Figure 2b). (3) The change in body size, (cell size) will cause a decrease in maximum feeding rates and attack rates in warm adapted predators. Body size, however, will not affect the temperature dependency of these rates or change the activation energies (Figure 2c – body size mediated feeding adaptation). (4) We assume that



163 the direct physiological adaptation of maximum feeding rates and attack rates leads to a  
 164 change of activation energies: warm adapted predators should show the steepest increase  
 165 (highest activation energy) as they should be well adapted to higher temperatures. Predators  
 166 adapted to lower temperatures should have the highest feeding rates at cold temperatures but  
 167 will not or just marginally be able to increase feeding with increasing temperature (Figure 2d  
 168 – direct feeding adaptation). These different scalings will result in a statistically significant  
 169 interaction. (5) If both mechanisms occur simultaneously, maximum feeding rates and attack  
 170 rates should be lowest for warm adapted predators and increase with decreasing adaptation  
 171 temperature while keeping the interactive direct effect of adaptation (Figure 2e – realised  
 172 feeding adaptation).

173 Figure 1:

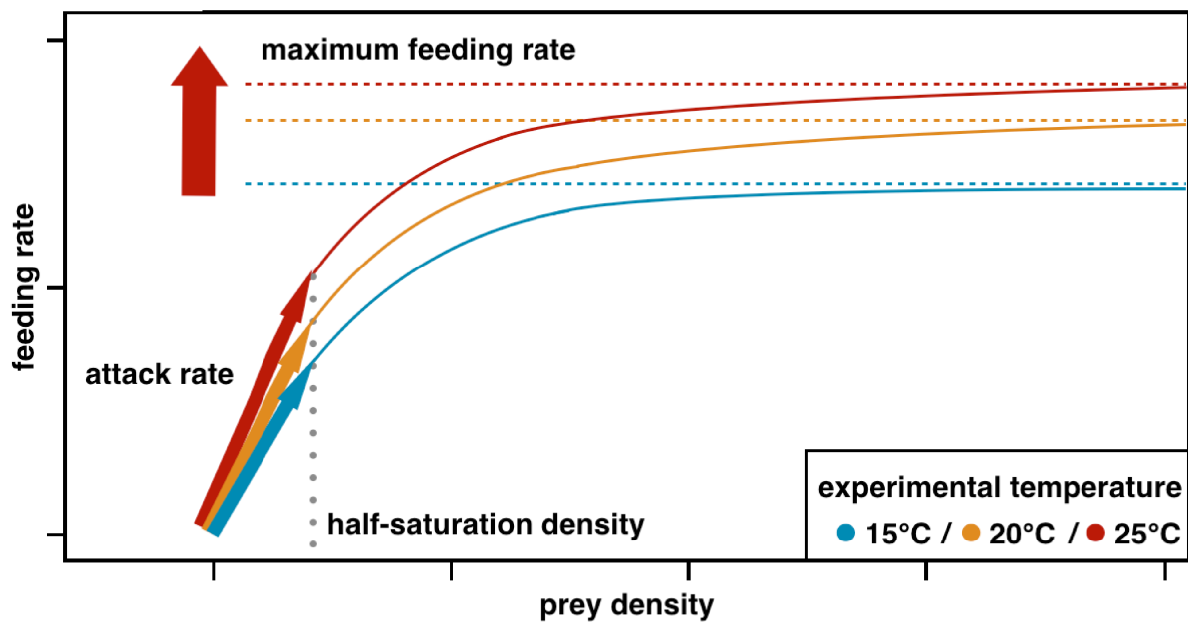

**Figure 1:** Expected trends for changes in maximum feeding rate (dashed lines) and half-saturation density (dotted line) with increasing temperatures based on previous studies (Rall *et al.*, 2012; Fussmann *et al.*, 2014). Maximum feeding rates are likely to increase with experimental temperature, while half-saturation densities have a variable scaling relationship being on average neutral. Maximum feeding rates of predators adapted to higher temperatures are expected to increase to cope with increasing metabolic demands with the highest maximum feeding rates at high temperatures and vice versa for cold adapted predators. Half-saturation densities are expected to not be influenced by temperature adaptation resulting in an increase of attack rates (arrows) at low prey densities in warm adapted predators to facilitate higher maximum feeding rates at high prey densities.

174 Figure 2:

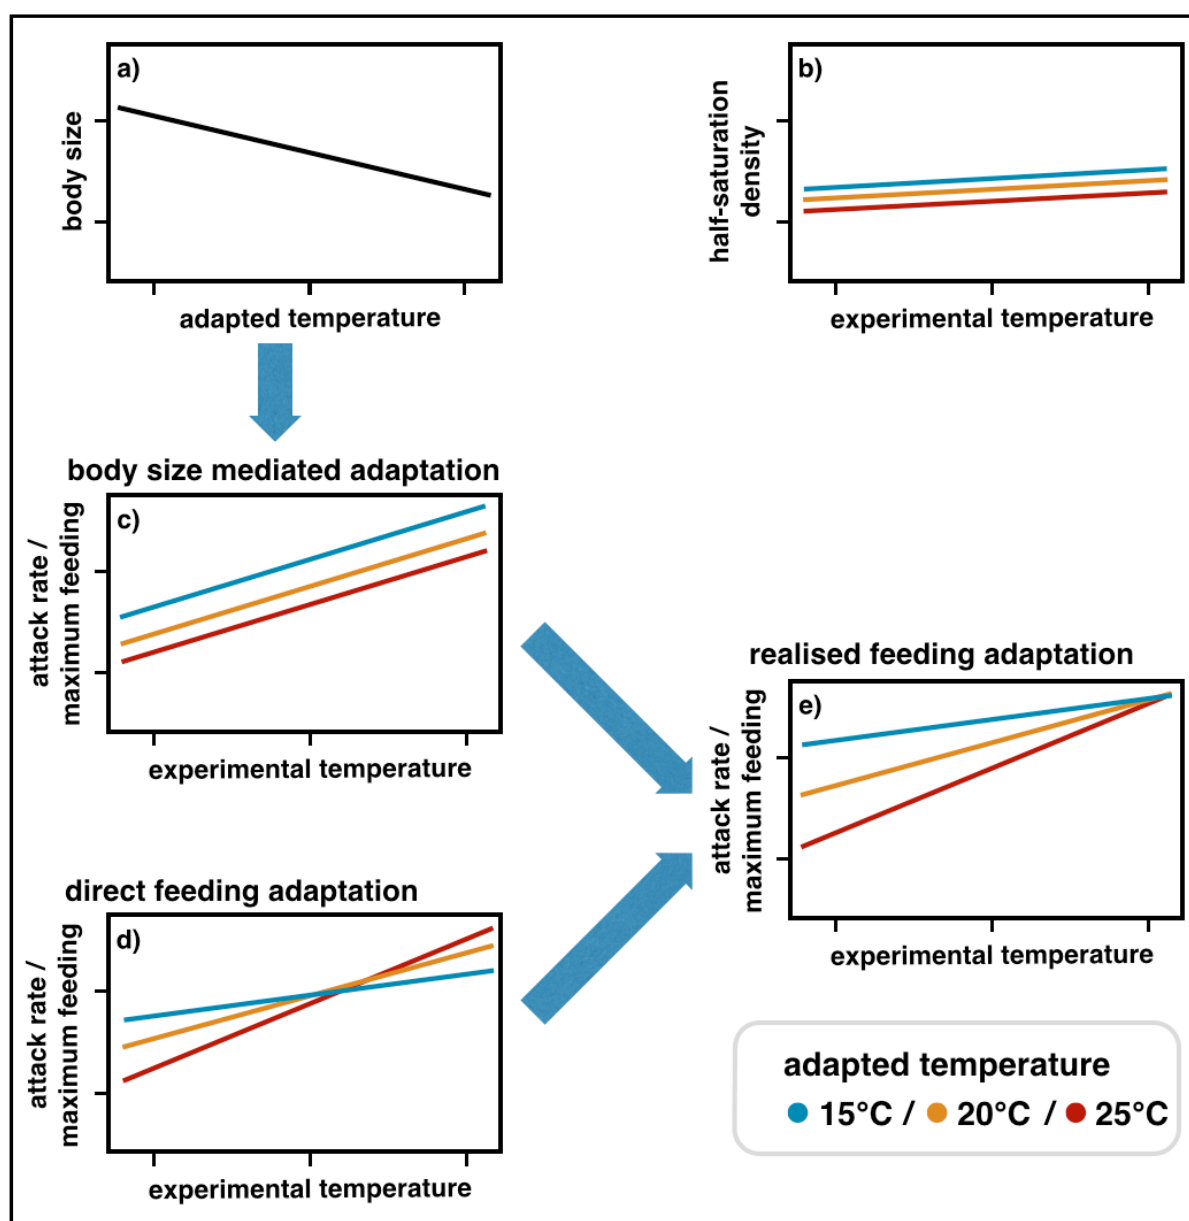

**Figure 2:** **a) Predator body size** (cell size) decreases with increasing adaptation temperature. **b) Half-saturation densities** are not expected to change with experimental or adaptation temperature. **c) Body size mediated adaptation:** Decreasing predator body size with increasing adaptation temperatures generally reduces maximum feeding rates in warm adapted predators with an assumed scaling exponent of 0.75 (Brown *et al.*, 2004). **d) Direct feeding adaptation:** Maximum feeding rates generally increase with rising experimental temperatures. Adaptation to temperature leads to a direct feeding adaptation of maximum feeding rates. Predators adapted to 15°C are expected to show the overall highest maximum feeding at 15°C experimental temperature, while predators adapted to 25°C should have the overall highest maximum feeding rates at 25°C. **e) Realised feeding adaptation:** Realised feeding adaptation shows the interactive effects of body size mediated adaptation and direct feeding adaptation on maximum feeding rates.

# Methods

## Laboratory Cultures:

We chose a model predator-prey system with the non-toxic bacterium *Pseudomonas fluorescens* CHA19 (Zuber *et al.*, 2003; Jousset *et al.*, 2009) as prey and the ubiquitous, predatory ciliated protozoan *Tetrahymena pyriformes* CCAP 1630/1W (CCAP Culture Collection of Algae and Protozoa, SAMS Limited, Scottish Marine Institute, Scotland, United Kingdom).

*Pseudomonas fluorescens* CHA19 was marked with GFP using a Mini-TN7 transposon I (Lambertsen *et al.*, 2004). After molecular cloning, one colony of the *Pseudomonas* strain was deep frozen at -80 °C in a 25 % glycerol solution. For every experiment a small sample was defrosted and incubated on LB-Agar containing 8 µg/l gentamycin before single colonies were incubated at room temperature in selective LB-medium over night. *Tetrahymena* was grown in 2% proteone peptose medium at 20°C. At the start point of the adaptation experiment, the culture of *Tetrahymena* was divided equally into 9 cultures, 3 cultures were henceforth kept at 15°C, three cultures were kept at 20°C and three cultures were kept 25°C. A temperature range between 15°C and 25°C is realistic for temperate aquatic systems in absence and presence of an extreme temperature event (Seifert *et al.*, 2015). For all adaptation temperatures, exponential growth rates of *Tetrahymena pyriformis* were measured to estimate the timeframes until approximately 20 generations were reached and functional response experiments were conducted (Supporting Information Figure 1). For predators kept at 15°C adaptation temperature, this was approximately 18 days, while for warmer adapted predators this time span was approximately 13 and 12 days for 20°C and 25°C adaptation temperature, respectively. 20 generations is consistent with other studies ranging from only

one generation (Sentis *et al.*, 2015) to 10 and 100 generations (Padfield *et al.*, 2015). To reduce the traces of medium prior to the functional response measurements bacteria were centrifuged (13.000 rpm x 1 min) and re-suspended three times in sugarless Ornston and Stannier (OS) medium (Ornston, 1966) diluted with ddH<sub>2</sub>O 1:10. Bacterial counts were measured using an Accuri C6 flow cytometer (BD Biosciences) on slow with an FSC-H of 8000 and a SSC-H of 2000. Ciliates were harvested by centrifugation at 300 rpm for 7 min at 0°C and re-suspended in OS medium three times. Prior to functional response experiments the predators were starved for 12 hours at their respective adaptation temperatures. The number of ciliates and their body sizes were measured with a Beckman Coulter Counter Multisizer 4 with a 100µl aperture on slow fluidics speed (Beckman Coulter, Inc.).

## Functional Response Experiments

Functional response experiments were conducted in 96-well plates. One column contained only the ciliated predator *Tetrahymena*, each of the remaining 11 columns contained a different bacterial prey density, with six rows as identical replicates and two rows as bacterial controls. Each well contained 200µl of sugar-free OS 1:10 media, prey densities ranged from 34778 bacteria µl<sup>-1</sup> to 1189416 bacteria µl<sup>-1</sup>, while predator abundances were kept constant at 100 predators µl<sup>-1</sup>. We used a fully factorial design for the functional response experiments, conducting experiments at the full experimental temperature range of 15°C, 20°C and 25°C with all three cultures of all adaptation temperatures after approximately 20 generations (Supporting Information Figure 1). Fluorescence intensities of bacteria were measured at two time points, after four hours into the experiment to avoid transient dynamics and at the end of the experiment, three hours thereafter, in an Infinite M200 plate reader (Tecan, Männedorf,

Switzerland). After orbital shaking for 10 seconds, each well was measured with an excitation wavelength of 485 nm and an emission wavelength of 520 nm reading 15 flashes with a manual gain of 100. To standardise a reliable value for bacterial abundance from the GFP signal measured in the plate reader, comparative measurements were taken using a plate reader and flow cytometer with an FSC-H of 8000 and SSC-H of 2000 and slow fluidics speed.

## Calculation of bacterial densities

We assessed bacterial fluorescence data by using a regression tree (tree-function, Ripley, 2016) classifying count-fluorescens relationships (Supporting Information, Figure 1). To estimate the bacterial density we first fitted the ln-transformed fluorescence signal measured in the plate reader against the ln-transformed number of cells measured with the flow cytometer (independent variable). All fluorescence values below a ln(GFP) of 6.03068 and a ln(count) of 9.071045 and above a ln(GFP) of 9.37609 and a ln(count) of 13.15602 were excluded from further analysis since we could not guarantee the proportionality between cell count and fluorescent signal beyond these counts. We then calculated bacterial abundance by predicting a linear model with GFP signal and experimental temperature as independent variables. To account for background signals, all experimental data was blanked against OS 1:10 ddH<sub>2</sub>O experimental media and treatments containing only the predator *Tetrahymena pyriformis*. This resulted in 141 control treatments containing only bacterial prey, and 306 functional response experiments that were used for further analysis (Supporting Information Table 1).

## 241 **Functional response**

242 The functional response describing the non-linear feeding rate,  $F$ , is defined as (Real (1977):

$$243 \quad F = \frac{f N}{\eta + N} \quad (1),$$

244 where  $N$  is the prey density,  $f$  is the maximum feeding rate and  $\eta$  is the half-saturation density.

245 In our experiment, additional to a constant decline of prey through time due to feeding,

246 natural growth and mortality of the bacterial prey occurred in control experiments. We

247 therefore decided to incorporate a Gompertz growth for microbiological systems (Gompertz,

248 1825; Paine *et al.*, 2012):

$$249 \quad G = rN \ln\left(\frac{K}{N}\right) \quad (2)$$

250 where  $r$  is the intrinsic growth rate of bacteria and  $K$  is the carrying capacity of bacteria.

251 A model accounting for changes in prey abundance over time due to feeding as well as

252 natural prey growth or death is expressed in the following ordinary differential equation

253 (ODE):

$$254 \quad \frac{dN}{dt} = \frac{-f N}{\eta + N} P + rN \ln\left(\frac{K}{N}\right) \quad (3),$$

255 where the change in prey abundance over time  $t$  is characterised by the functional response

256 model;  $P$  is the predator density. To account for changes of the parameters with experimental

257 temperature we calculated Arrhenius temperatures and activation energies  $E_{f, \eta}$ :

$$258 \quad f = f_0 e^{\frac{E_f (T_e - T_0)}{k T_e T_0}} \quad (4a),$$

$$259 \quad \eta = \eta_0 e^{\frac{E_\eta (T_e - T_0)}{k T_e T_0}} \quad (4b),$$

260 where  $f_0$  and  $\eta_0$  are normalisation constants,  $T_e$  [K] is the absolute experimental temperature,  
 261  $T_0$  [K] is the normalisation temperature and  $k$  [eV K<sup>-1</sup>] is the Boltzmann's constant yielding  
 262 the well known Arrhenius equation (Arrhenius, 1889; Gillooly *et al.*, 2001).  
 263 Additionally, growth and carrying capacity also scale with temperature (Gillooly *et al.*, 2001;  
 264 Savage *et al.*, 2004):

$$265 \quad r = r_0 e^{\frac{E_r (T_e - T_0)}{k T_e T_0}} \quad (4c);$$

$$266 \quad K = K_0 e^{\frac{E_K (T_e - T_0)}{k T_e T_0}} \quad (4d);$$

267 with  $r_0$  and  $K_0$  being normalisation constants, and  $E_r$  and  $E_K$  being the experimental activation  
 268 energies. To investigate the effects of adaptation, we extended the Arrhenius equation using a  
 269 term describing the dependency of the maximum feeding rate,  $f$ , and of the half-saturation  
 270 density,  $\eta$ , on the temperature the predator was adapted to  $T_a$ :

$$271 \quad f = f_0 e^{\frac{E_f (T_e - T_0)}{k T_e T_0}} e^{\frac{A_f (T_a - T_0)}{k T_a T_0}} \quad (5a);$$

$$272 \quad \eta = \eta_0 e^{\frac{E_\eta (T_e - T_0)}{k T_e T_0}} e^{\frac{A_\eta (T_a - T_0)}{k T_a T_0}} \quad (5b);$$

273 where  $A_f$  and  $A_\eta$  are the activation energies for temperature adaptation. Both, maximum  
 274 feeding and half-saturation density may interactively react to both, experimental and  
 275 adaptation temperature (i.e.  $E_{f,\eta}$  is different for different  $T_a$ ). We therefore introduced an  
 276 interaction term,  $I_{f,\eta}$ , into equation 5a, b (i.e. statistical interaction term), yielding:

$$277 \quad f = f_0 e^{\frac{E_f (T_e - T_0)}{k T_e T_0}} e^{\frac{A_f (T_a - T_0)}{k T_a T_0}} e^{\frac{I_f (T_e - T_0) (T_a - T_0)}{k T_e T_0 k T_a T_0}} \quad (6a);$$

$$278 \quad \eta = \eta_0 e^{\frac{E_\eta (T_e - T_0)}{k T_e T_0}} e^{\frac{A_\eta (T_a - T_0)}{k T_a T_0}} e^{\frac{I_\eta (T_e - T_0) (T_a - T_0)}{k T_e T_0 k T_a T_0}} \quad (6b).$$



Further, we calculated realised activation energies for maximum feeding rates  $\tilde{E}_f$  of the experimental temperature for each adaptation temperature:

$$\tilde{E}_f = E_f + I_f \frac{(T_a - T_0)}{k T_a T_0} \quad (7)$$

Maximum feeding rates,  $f$ , scale not only with temperature but also with body size with a power-law exponent of 0.75 according to the MTE (Yodzis & Innes, 1992; Brown *et al.*, 2004). Half-saturation densities,  $\eta$ , can be defined as the quotient of maximum feeding rate and attack rate ( $\eta = f/a$ , Koen-Alonso, 2007), where both parameters share the same power-law exponent of 0.75 (Brown *et al.*, 2004) and do not scale with body size (Yodzis & Innes, 1992; Hansen *et al.*, 1997).

The body size dependent functional response can therefore be described with a  $3/4$  power law scaling of the maximum feeding rate,  $f$ , with body size,  $m$ :

$$F = \frac{(f m^{0.75}) N}{\eta + N} = \left( \frac{f N}{\eta + N} \right) m^{0.75} \quad (8).$$

To demonstrate the effect of direct feeding adaptation (Figure 2d – direct feeding adaptation), we corrected our fitted results based equation on 5a (see below and in the Supporting Information a description of the fitting methods) by dividing feeding rates by the metabolic body size of the predator (Schmitz & Price, 2011; Schneider *et al.*, 2012):

$$f_m = f_0 e^{\frac{E_f (T_e - T_0)}{k T_e T_0}} e^{\frac{A_f (T_a - T_0)}{k T_a T_0}} e^{\frac{I_f (T_e - T_0) (T_a - T_0)}{k T_e T_0 k T_a T_0}} / m^{0.75} \quad (9).$$

Mean ciliate body size [ $\mu\text{m}^3$ ], adapted to the respective temperatures at the time of experiment after an adaptation period of approximately 20 generations, was measured in the Beckmann Coulter Counter. Note that this calculation was done after fitting the functional response model to the data. This method to correct for body size differences in temperature

dependent functional response parameters was already successfully applied in prior studies (Sentis *et al.*, 2012, 2014).

## Fitting algorithm

We used Bayesian methods for parameter estimation (equation 3 including scaling relationships for  $r$ ,  $K$ ,  $f$  and  $\eta$ ). Data of prey densities after 4 hours  $N(t_4)$  were used as initial values for the numerical solution of the ordinary differential equations (ODE) and data of densities after 7 hours  $N(t_7)$  were modelled using ln-normally distributed errors. Model parameters for control treatments and treatments with predators present were estimated within the same model. Samples from the posterior distribution of the parameters given the data were drawn using Hamiltonian Monte Carlo sampling in Stan, accessed via the RStan package (Stan Development Team, 2016). The Stan software comes with a built in ODE-solver, making it suitable for fitting ODE-based functional responses (equation 3). We used normally distributed uninformative priors with zero means and standard deviations of 100,000 for  $K_0$  and  $\eta_0$ , standard deviations of 100 for all other model parameters and a uniform distribution on the interval between 0 and 100 as a prior for the model's standard error. The parameters  $r_0$ ,  $K_0$ ,  $f_0$ , and  $\eta_0$  were provided with a lower boundary of zero. We ran 5 Markov chains in parallel with an adaptation phase of 1,000 iterations and 20,000 sampling iterations each, summing up to 100,000 samples of the posterior distribution. Visual inspection of the trace plots and density plots showed a good mixture of the chains. Values of  $\hat{R}$  sufficiently close to 1 and an adequate effective sample mass  $n_{eff}$  further verified convergence (Supporting Information, Table 3). We tested different models for including adaptation temperature in the scaling relationships of  $f$  and  $\eta$  (Table 1). For model comparison

we used the Watanabe-Akaike information criterion (WAIC), which can be computed from the log-likelihood values of the posterior samples by the loo package (Vehtari & Gelman, 2016). We will report results only for model 3, which performed best in the model selection (Supporting Information, Table 2). Model 3 includes an interaction term of experimental and adaptation temperature in the scaling of maximum feeding rate  $f$ , but not in the scaling of half-saturation density  $\eta$ . The fits of the full ODE together with the measured data points as well as functional response plots can be found in the Supporting Information (Supporting Information Figure 3 and 4). See Supporting Information also for full summary statistics, density plots and model code.

**Table 1:** Models for including experimental and adaptation temperature. All models include ln-linear terms of experimental temperature in the scaling of  $f$ ,  $\eta$ ,  $r$ ,  $K$  (equations 4a-d).

| Model | Equations  | Terms for influence of adaptation temperature                          |
|-------|------------|------------------------------------------------------------------------|
| 1     | (4a), (4b) | none                                                                   |
| 2     | (5a), (5b) | ln-linear in $f$ and $\eta$                                            |
| 3     | (6a), (5b) | interaction with experimental temperature in $f$ , ln-linear in $\eta$ |
| 4     | (5a), (6b) | ln-linear in $f$ , interaction with experimental temperature in $\eta$ |
| 5     | (6a), (6b) | interaction with experimental temperature in $f$ and $\eta$            |

## Results

We found that over the course of 20 generations, predator body sizes decreased with increasing adaptation temperature, and thus predators adapted to higher temperatures had smaller average body sizes than predators kept at lower temperatures (Figure 3a). The half-saturation density (Figure 3b) generally increased with experimental temperature with no significant differences for predators adapted to different temperatures and a high variability (Table 2). According to the WAIC, model 3 (equations 6a, 5b) represented our data best, therefore, there was no interactive effect of experimental and adaptation temperature on half-saturation density. The effect of experimental temperature on half-saturation density equaled the activation energy  $E_{\eta} = 4.359$  (with a standard deviation of 1.698 and a CI from 2.179 to 8.680) for predators adapted to all three adaptation temperatures. The effect of adaptation temperature on half-saturation density was slightly negative, but insignificant (Table 2). As half-saturation densities should not be affected by body size (Hansen et al., 1997) the direct effect of adaptation equaled the realised effect (see Figure 2). Attack rates decreased with experimental temperature, with attack rates of cold adapted predators decreasing faster than attack rates of warm adapted temperature (Supporting Information Figure 9 and Table 4, 5).

In order to calculate the direct effect of adaptation on maximum feeding rates (Figure 2d), we factored body size into the respective maximum feeding rates, a posteriori to the per capita estimation of functional response parameters (equation 8 and 9). Investigating the direct effect of adaptation on maximum feeding rates revealed that warm adapted predators had highest maximum feeding rates at the highest experimental temperatures and lowest maximum feeding rates at the lowest experimental temperature (Figure 3c). Recent studies

355 suggest a power law scaling of body size close to one for chemo-heterotrophic unicellular  
 356 organisms yielding the same general results (Okie et al., 2016; results shown in Supporting  
 357 Information, Figure 10). The physiological temperature adaptation was affecting activation  
 358 energies. In predators adapted to 15°C, the activation energy for maximum feeding rate  
 359 (equation 6a) was approximately 0.66 and increased with adaptation temperature to  
 360 approximately 1.05 and 1.43 for predators adapted to 20°C and 25°C, respectively (Table 3).  
 361 In the realised adaptation scenario, maximum feeding rates (Figure 3d) generally increased  
 362 with experimental temperature. Over most of the observed range of experimental  
 363 temperatures, maximum feeding rate was highest for predators adapted to 15°C, followed by  
 364 those adapted to 20°C, and lowest for those adapted to 25°C. Predators adapted to 25°C  
 365 showed the steepest increase in maximum feeding rate with increasing experimental  
 366 temperature, while predators adapted to 20°C and 15°C showed a shallower increase (Figure  
 367 3d). This resulted from a positive interaction between experimental and adaptation  
 368 temperature (Table 1). However, at 25°C experimental temperature, there was no difference  
 369 between maximum feeding rates of predators adapted to 15°C, 20°C or 25°C.

**Table 2:** Mean values of the distribution and their standard deviation for normalisation constants of maximum feeding rate  $f_0$  and half-saturation density  $\eta_0$  and their activation energy main effects of experimental temperature  $E_f$ ,  $E_\eta$ , of adaptive temperature  $A_f$ ,  $A_\eta$ , and the interaction term for maximum feeding rate  $I_f$ . The range between 2.5% and 97.5% of the distribution give the 95% credible intervals. For full summary statistic, please see Supporting Information Table 3.

|          | mean     | sd       | 2.5%   | 50%      | 97.5%    |
|----------|----------|----------|--------|----------|----------|
| $f_0$    | 2.654    | 0.085    | 2.505  | 2.647    | 2.841    |
| $\eta_0$ | 2378.247 | 1932.152 | 83.463 | 1930.298 | 7115.469 |
| $E_f$    | 1.054    | 0.056    | 0.950  | 1.052    | 1.168    |
| $E_\eta$ | 4.359    | 1.698    | 2.179  | 3.976    | 8.680    |
| $A_f$    | -0.362   | 0.053    | -0.463 | -0.364   | -0.252   |
| $A_\eta$ | -0.530   | 0.627    | -1.531 | -0.617   | 0.860    |
| $I_f$    | 0.569    | 0.122    | 0.380  | 0.548    | 0.855    |

**Table 3:** Median of estimated activation energies of maximum feeding rate (equation 7) for the ciliate predator *Tetrahymena pyriformis* adapted to 15°C, 20°C and 25°C for approximately 20 generations.

| adaptation temperature | activation energy    |
|------------------------|----------------------|
|                        | maximum feeding rate |
| 15°C                   | 0.663                |
| 20°C                   | 1.054                |
| 25°C                   | 1.431                |

### 379 Figure 3:

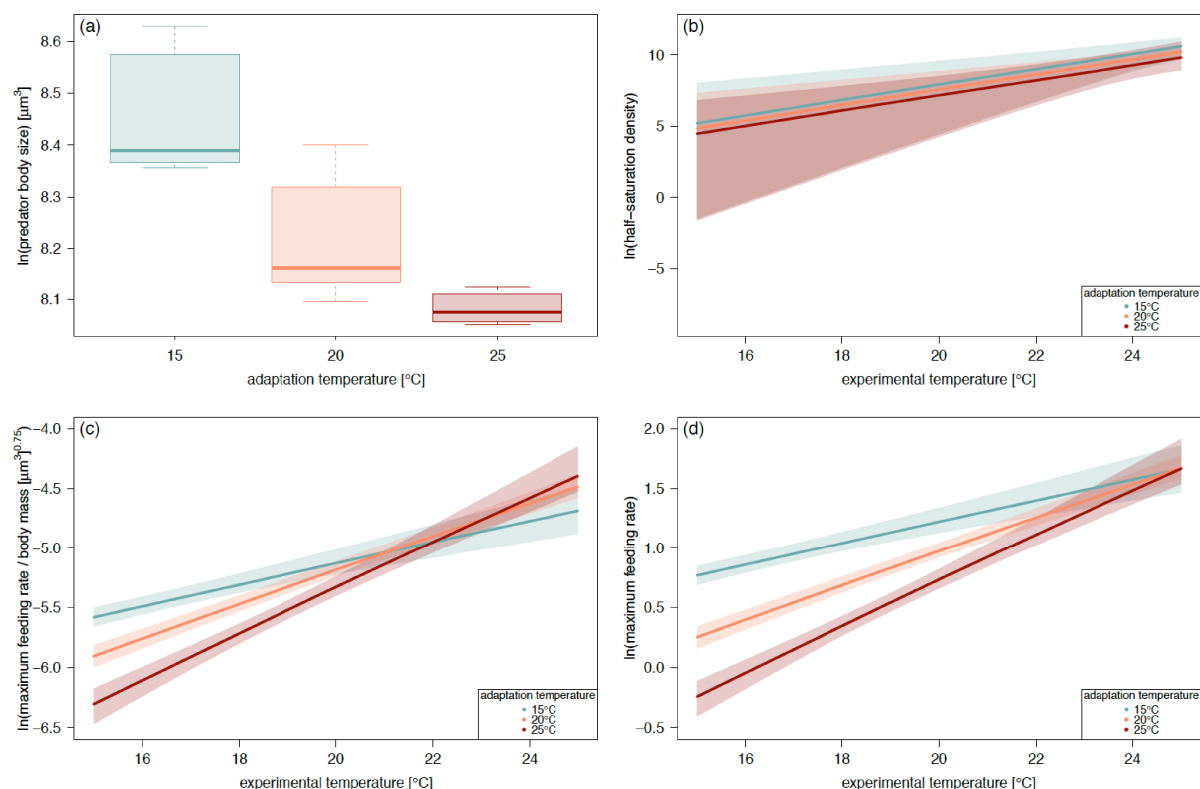

**Figure 3: a) Body sizes** of *Tetrahymena pyriformis* adapted to 15°C, 20°C and 25°C in  $\mu\text{m}^3$  measured in the Beckmann Coulter Counter decreased with adaptation temperature. **b) Half-saturation densities** for *Tetrahymena pyriformis* adapted to 15°C (blue), 20°C (orange) and 25°C (red) increased with experimental temperature. There was no significant difference for half-saturation density between predators adapted to different temperatures along the gradient of experimental temperatures. **c) Metabolic body-size accounted maximum feeding rates** ( $f / \text{body size}^{0.75}$  [ $\mu\text{m}^3$ ]) for *Tetrahymena pyriformis* adapted to 15°C, 20°C and 25°C along an experimental temperature gradient showed an increase with experimental temperature while predators adapted to 15°C and 25°C showed the highest maximum feeding rates at their adaptation temperature, respectively. **d) Maximum feeding rates** for *Tetrahymena pyriformis* adapted to 15°C, 20°C and 25°C increased with experimental temperatures. While maximum feeding rates slightly decreased with adaptation temperatures, predators adapted to 25°C over 20 generations showed the strongest increase in maximum feeding with experimental temperature due to a positive interaction effect of experimental and adaptation temperature. Solid lines represent median values, shaded areas indicate 95% credibility intervals.

## Discussion

Increasing temperatures are putting a strain on biodiversity in ecosystems world wide. Previous studies have revealed an increasing mismatch between maximum feeding rates and metabolism with warming as an often overlooked and until recently poorly understood cause of extinction (Vucic-Pestic *et al.*, 2011; Rall *et al.*, 2012; Fussmann *et al.*, 2014). Here, we investigated the effect of possible temperature adaptations on feeding interactions. After an adaptation period of approximately 20 generations, predator body size had decreased significantly for predators adapted to 25°C compared to predators kept at the lowest adaptation temperature according to our prediction based on previous studies (Bergmann, 1847; Daufresne *et al.*, 2009; Yvon-Durocher *et al.*, 2011). We ran functional response experiments along a temperature gradient with predators adapted to different temperature regimes and found that experimental temperature has an effect on half-saturation densities of predators adapted to all three adaptation temperatures (Fussmann *et al.*, 2014). Using more than one predator per experimental treatment, the particularly high values of half-saturation densities might be explained by predator interference. Interference has been observed among unicellular organisms (Curds & Cockburn, 1968) and can be affected by temperature changes (Lang *et al.*, 2012). By reducing the time available for prey encounters, interference lowers the feeding efficiency of predators (Abrams & Ginzburg, 2000). In cases where half-saturation density and interference both increase with warming, this could lead to a combined effect on half-saturation densities. Declining attack rates with experimental temperature can be caused by increasing interference and therefore corroborate this assumption. However, since we did not vary predator density to manipulate the strength of predator interference, this can only be speculated. According to our model comparison there is no interactive effect of



403 experimental and adaptation temperature on half-saturation density. This suggests, that the  
 404 effect of adaptation temperature on half-saturation-density is buffered by a simultaneous  
 405 temperature adaptation of attack rate and maximum feeding rate. Therefore, adaptation of  
 406 half-saturation densities should be excluded as a possible mechanism to counteract  
 407 temperature effects on carrying capacities and decreasing prey abundances at higher  
 408 temperatures in natural systems. However, predators adapted to higher temperatures show the  
 409 steepest increase of maximum feeding rate with increasing experimental temperature  
 410 enabling them to react to increasing temperatures quicker and increase their energy intake  
 411 faster within the measured temperature range. Predators adapted to 25°C show lower  
 412 maximum feeding rates at 15°C and 20°C than cold adapted predators, while at 25°C  
 413 experimental temperature, all predators show similar maximum feeding rates. In our  
 414 experiment we were unable to document potential changes in metabolism for predators  
 415 adapted to different adaptation temperatures, which leaves two possible hypotheses to explain  
 416 our findings. The hypothesis that metabolic rates were unaffected by adaptation temperature  
 417 leads to the conclusion that predators adapted to higher temperatures have gained a  
 418 disadvantage at lower experimental temperatures becoming less efficient compared to their  
 419 cold adapted counterparts, while there is no clear advantage gained at high experimental  
 420 temperatures. However, due to smaller body sizes of warm adapted predators, predators  
 421 adapted to 25°C adaptation temperature are expected to have lower metabolic demands  
 422 compared to cold adapted predators, if any potential physiological adaptation of metabolism  
 423 is taken into account (Brown *et al.*, 2004). Relevantly, our experimental units contained more  
 424 than one predator individual, these lowered metabolic demands can lead to an increase in  
 425 predator interference, reducing maximum feeding rates at low experimental temperatures.  
 426 With increasing experimental temperatures, these predators will prioritise feeding over

predator interaction leading to the strong increase of maximum feeding rates with experimental temperature in warm adapted predators. While some studies predict activation energies for maximum feeding rates ranging from 0.6-0.7 eV, our results are in the range of activation energies reported for ciliated protozoan and other unicellular organisms around 0.772 eV (Hansen *et al.*, 1997; Vasseur & McCann, 2005). Activation energies for metabolism drawn from respiration measurements by Laybourn & Finlay (1976) of 0.96 eV (Fussmann *et al.*, 2014), match the range of activation energies of maximum feeding rates in our functional response measurement. Predators adapted to 20°C and 25°C show higher activation energies to counteract increasing metabolic demands at higher temperatures. Combining the strong increase in maximum feeding rate with the change in intercept caused by body size adaptation, these results are in line with the hypothesised interactive effect of body size adaptation, and adaptation temperature and experimental warming on maximum feeding rates.

Over the timespan of 20 generations, our results as well as previous studies have shown that adaptation to increased temperatures influences protist body sizes (Atkinson *et al.*, 2003) highlighting the importance of trans-generational studies regarding not only genetic adaptation but also phenotypic changes (DeLong *et al.*, 2016). Larger species, predominantly found at higher trophic levels (Riede *et al.*, 2011) are most vulnerable to extinction due to an energetic mismatch with increasing temperatures (Binzer *et al.*, 2012). This leads to a shift towards smaller species in aquatic systems (Daufresne *et al.*, 2009; Yvon-Durocher *et al.*, 2011). The relationship between increasing predator body size and maximum feeding rate follows a  $\frac{3}{4}$  power-law scaling (Hansen *et al.*, 1997; Rall *et al.*, 2012), leading to lower maximum feeding rates in smaller predators. To disentangle the indirect effect of predator body size on the realised maximum feeding rate from the direct effect of physiological

adaptation we corrected our results accordingly (see figure 2 and equations 8 and 9 for a detailed derivation). Once this change in body size is accounted for, we found that at 25°C experimental temperature, maximum feeding rates shift towards a scenario that suggest a specialised temperature adaptation of predators. While at 15°C predators adapted to that temperature show the highest maximum feeding rates, at 25°C predators adapted to 25°C show the highest maximum feeding rates. There is not one culture adapted to have the best fitness at the full temperature range, rather predators seemed to be adapted to their respective temperature. The direct physiological adaptation of maximum feeding rates leads to a stronger increase in maximum feeding rate with experimental temperature in warm adapted predators. Further, in form of a morphological adaptation to warming, with a smaller average body size, predators increase per-biomass consumption while reducing metabolic demand. This increases the effect of physiological adaptation of maximum feeding rates, resulting in a combined effect increasing overall energy efficiency in warm adapted predators at high temperatures.

In conclusion, our results suggest that while un-adapted predators face a mismatch between maximum feeding rates and metabolic demands with increasing temperatures leading to starvation and extinction of predators, adaptation poses a viable escape from this scenario. By decreasing their body size over the course of 20 generations at higher temperatures, predators lower their per-capita metabolic rates. Therefore, the ratio between metabolic costs and maximum feeding rates increases for warm adapted predators, decreasing their risk of starvation. The decrease in the risk of starvation also implies a decreased risk of extinction which may buffer expected biodiversity loss with climate warming and increased ecosystem stability.

It is widely accepted that adaptation occurs within ecological time spans and is therefore of

utmost importance for the understanding of population stability and ecosystem dynamics under the threat of an increasingly fast changing environment (Holt, 1990; Lynch & Lande, 1993; Burger & Lynch, 1995; Merilä, 2012; Merilä & Hendry, 2014). Especially in a homogeneous environment like water, where stressors cannot be avoided by migration or refuge in microhabitats, the strain of climate change poses a particularly high risk for populations (Bergmann *et al.*, 2010). Adaptation might be a possible way for populations to deal with increasing temperatures and persist in a warming environment.

## Acknowledgements:

K.E.F. received funding from the Dorothea Schlözer Programme of Göttingen University. K.E.F., B.R., U.B. and B.C.R. gratefully acknowledge the support of the German Centre for Integrative Biodiversity Research (iDiv) Halle-Jena-Leipzig funded by the German Research Foundation (FZT 118). We would like to thank A.Binzer and D.Perkins for helpful suggestions and comments.

## References:

- Abrams PA, Ginzburg LR (2000) The nature of predation: prey dependent, ratio dependent or neither? *Trends in Ecology and Evolution*, **15**, 337–341.
- Abrams PA, Walters CJ (2010) Invulnerable prey and the paradox of enrichment. *Ecology*, **77**, 1125–1133.
- Angilletta Jr. MJ (2009) Looking for answers to questions about heat stress: researchers are getting warmer. *Functional Ecology*, **23**, 231–232.
- Arrhenius S (1889) Über die Reaktionsgeschwindigkeit bei der Inversion von Rohrzucker durch Säuren. *Zeitschrift für Physikalische Chemie*, **4**, 226–248.
- Atkinson D, Ciotti BJ, Montagnes DJS (2003) Protists decrease in size linearly with temperature: ca. 2.5% °C<sup>-1</sup>. *Proceedings of the Royal Society B: Biological Sciences*, **270**, 2605–2611.
- Bale JS, Masters GJ, Hodkinson ID et al. (2002) Herbivory in global climate change research: direct effects of rising temperature on insect herbivores. *Global Change Biology*, **8**, 1–16.
- Barnosky AD, Matzke N, Tomiya S et al. (2011) Has the earth's sixth mass extinction already arrived? *Nature*, **471**, 51–57.
- Bergmann C (1847) Über die Verhältnisse der Wärmeökonomie der Thiere zu ihrer Grösse. 595–708 pp.
- Bergmann N, Winters G, Rauch G et al. (2010) Population-specificity of heat stress gene induction in northern and southern eelgrass *Zostera marina* populations under simulated global warming. *Molecular Ecology*, **19**, 2870–83.
- Berlow EL, Dunne JA, Martinez ND, Stark PB, Williams RJ, Brose U (2009) Simple prediction of interaction strengths in complex food webs. *Proceedings of the National Academy of Sciences of the United States of America*, **106**, 187–191.
- Binzer A, Guill C, Brose U, Rall BC (2012) The dynamics of food chains under climate change and nutrient enrichment. *Philosophical Transactions of the Royal Society B: Biological Sciences*, **367**, 2935–2944.
- Binzer A, Guill C, Rall BC, Brose U (2016) Interactive effects of warming, eutrophication and size structure: impacts on biodiversity and food-web structure. *Global Change Biology*, **22**, 220–227.
- Brose U (2010) Body-mass constraints on foraging behaviour determine population and food-web dynamics. *Functional Ecology*, **24**, 28–34.
- Brose U, Dunne JA, Montoya JM, Petchey OL, Schneider FD, Jacob U (2012) Climate

- change in size-structured ecosystems. *Philosophical Transactions of the Royal Society B: Biological Sciences*, **367**, 2903–2912.
- Brown JH, Gillooly JF, Allen AP, Savage VM, West GB (2004) Toward a metabolic theory of ecology. *Ecology*, **85**, 1771–1789.
- Burger R, Lynch M (1995) Evolution and extinction in a changing environment: a quantitative-genetic analysis. *Evolution*, **49**, 151–163.
- Callahan HS, Maughan H, Steiner UK (2008) Phenotypic plasticity, costs of phenotypes, and costs of plasticity: toward an integrative view. *Annals of the New York Academy of Sciences*, **1133**, 44–66.
- Chevin L-M, Lande R, Mace GM (2010) Adaptation, plasticity, and extinction in a changing environment: towards a predictive theory. *PLoS Biology*, **8**, e1000357.
- Chown SL, Hoffmann A a., Kristensen TN, Angilletta MJ, Stenseth NC, Pertoldi C (2010) Adapting to climate change: a perspective from evolutionary physiology. *Climate Research*, **43**, 3–15.
- Cook J, Nuccitelli D, Green SA et al. (2013) Quantifying the consensus on anthropogenic global warming in the scientific literature. *Environmental Research Letters*, **8**, 24024.
- Curds CR, Cockburn A (1968) Studies on the growth and feeding of *Tetrahymena pyriformis* in axenic and monoxenic culture. *Journal of General Microbiology*, **54**, 343–358.
- Daufresne M, Lengfellner K, Sommer U (2009) Global warming benefits the small in aquatic ecosystems. *Proceedings of the National Academy of Sciences of the United States of America*, **106**, 12788–12793.
- Dell AI, Pawar S, Savage VM (2014) Temperature dependence of trophic interactions are driven by asymmetry of species responses and foraging strategy. *Journal of Animal Ecology*, **83**, 70–84.
- DeLong JP, Forbes VE, Galic N, Gibert JP, Laport RG, Phillips JS, Vavra JM (2016) How fast is fast? Eco-evolutionary dynamics and rates of change in populations and phenotypes. *Ecology and Evolution*, **68588**, 1–9.
- Fussmann KE, Schwarzmüller F, Brose U, Jousset A, Rall BC (2014) Ecological stability in response to warming. *Nature Climate Change*, **4**, 206–210.
- Geerts AN, Vanoverbeke J, Vanschoenwinkel B et al. (2015) Rapid evolution of thermal tolerance in the water flea *Daphnia*. *Nature Climate Change*, **5**, 665–668.
- Gillooly JF, Brown JH, West GB, Savage VM, Charnov EL (2001) Effects of size and temperature on metabolic rate. *Science*, **293**, 2248–2251.
- Gómez JJ, Goy A, Canales ML (2008) Seawater temperature and carbon isotope variations in

- belemnites linked to mass extinction during the Toarcian (Early Jurassic) in central and northern Spain *Palaeogeography, Palaeoclimatology, Palaeoecology*, **258**, 28–58.
- Gompertz B (1825) On the nature of the function expressive of the law of human mortality, and on a new mode of determining the value of life contingencies. *Philosophical Transactions of The Royal Society of London*, **115**, 513–583.
- Hansen PJ, Bjørnsen PK, Hansen BW (1997) Zooplankton grazing and growth: scaling within the 2–2,000 µm body size range. *Limnology and Oceanography*, **42**, 687–704.
- Holling CS (1959) Some characteristics of simple types of predation and parasitism. *The Canadian Entomologist*, **91**, 385–398.
- Holt RD (1990) The microevolutionary consequences of climate change. *Trends in Ecology & Evolution*, **5**, 311–315.
- IPCC (2014) *Climate Change 2014: Synthesis Report. Contribution of Working Groups I, II and III to the Fifth Assessment Report of the Intergovernmental Panel on Climate Change*. 151 pp.
- Jeschke JM, Kopp M, Tollrian R (2002) Predator functional responses: discriminating between handling and digesting prey. *Ecological Monographs*, **72**, 95–112.
- Joachimski MM, Lai X, Shen S et al. (2012) Climate warming in the latest Permian and the Permian-Triassic mass extinction. *Geology*, **40**, 195–198.
- Jousset A, Rochat L, Péchy-Tarr M, Keel C, Scheu S, Bonkowski M (2009) Predators promote defence of rhizosphere bacterial populations by selective feeding on non-toxic cheaters. *The ISME Journal*, **3**, 666–674.
- Kalinkat G, Schneider FD, Digel C, Guill C, Rall BC, Brose U (2013) Body masses, functional responses and predator-prey stability. *Ecology Letters*, **16**, 1126–1134.
- Koen-Alonso M (2007) A process-oriented approach to the multispecies functional response. *From Energetics to Ecosystems: The Dynamics and Structure of Ecological Systems*, 1–36.
- Lambertsen L, Sternberg C, Molin S (2004) Mini-Tn7 transposons for site-specific tagging of bacteria with fluorescent proteins. *Environmental Microbiology*, **6**, 726–732.
- Lang B, Rall BC, Brose U (2012) Warming effects on consumption and intraspecific interference competition depend on predator metabolism. *Journal of Animal Ecology*, **81**, 516–523.
- Laybourn J, Finlay BJ (1976) Respiratory energy losses related to cell weight and temperature in ciliated protozoa. *Oecologia*, **24**, 349–355.
- Leuzinger S, Luo Y, Beier C, Dieleman W, Vicca S, Körner C (2011) Do global change



- experiments overestimate impacts on terrestrial ecosystems? *Trends in Ecology and Evolution*, **26**, 236–241.
- Lynch M, Lande R (1993) Evolution and extinction in response to environmental change *Biotic Interactions and Global Change*, pp. 234–250.
- May RM (1972) Will a large complex system be stable? *Nature*, **238**, 413–414.
- Mayhew PJ, Jenkins GB, Benton TG (2008) A long-term association between global temperature and biodiversity, origination and extinction in the fossil record. *Proceedings of The Royal Society*, **275**, 47–53.
- McCann KS (2000) The diversity-stability debate. *Nature*, **405**, 228–233.
- McPeck MA, Schrot AK, Brown JM (1996) Adaptation to predators in a new community: swimming performance and predator avoidance in damselflies. *Ecology*, **77**, 617–629.
- MEA (2005) Ecosystems and human well-being health synthesis. *Ecosystems*, **5**, 1–100.
- Meehan TD (2006) Energy use and animal abundance in litter and soil communities. *Ecology*, **87**, 1650–1658.
- Merilä J (2012) Evolution in response to climate change: in pursuit of the missing evidence. *BioEssays*, **34**, 811–818.
- Merilä J, Hendry AP (2014) Climate change, adaptation, and phenotypic plasticity: the problem and the evidence. *Evolutionary Applications*, **7**, 1–14.
- Montoya JM, Raffaelli D (2010) Climate change, biotic interactions and ecosystem services. *Philosophical Transactions of the Royal Society B-Biological Sciences*, **365**, 2013–2018.
- Okie JG, Smith VH, Martin-Cereceda M (2016) Major evolutionary transitions of life, metabolic scaling and the number and size of mitochondria and chloroplasts. *Proceedings of The Royal Society B*, **283**.
- Ornston LN (1966) The conversion of catechol and protocatechuate to beta-oxadipate by *Pseudomonas putida*. IV. Regulation. *Journal of Biological Chemistry*, **241**, 3800–3810.
- Ott D, Rall BC, Brose U (2012) Climate change effects on macrofaunal litter decomposition: the interplay of temperature, body masses and stoichiometry. *Philosophical Transactions of the Royal Society B: Biological Sciences*, **367**, 3025–3032.
- Padfield D, Yvon-Durocher G, Buckling A, Jennings S, Yvon-Durocher G (2015) Rapid evolution of metabolic traits explains thermal adaptation in phytoplankton. *Ecology Letters*, 1–10.
- Paine CET, Marthews TR, Vogt DR, Purves D, Rees M, Hector A, Turnbull LA (2012) How to fit nonlinear plant growth models and calculate growth rates: an update for ecologists. *Methods in Ecology and Evolution*, **3**, 245–256.



624 Pereira HM, Leadley PW, Proença V et al. (2010) Scenarios for global biodiversity in the 21st  
625 century. *Science*, **330**, 1496–1501.

626 Quintero I, Wiens JJ (2013) Rates of projected climate change dramatically exceed past rates  
627 of climatic niche evolution among vertebrate species. *Ecology Letters*, **16**, 1095–1103.

628 Rall BC, Vucic-Pestic O, Ehnes RB, Emmerson M, Brose U (2010) Temperature, predator-  
629 prey interaction strength and population stability. *Global Change Biology*, **16**, 2145–  
630 2157.

631 Rall BC, Brose U, Hartvig M, Kalinkat G, Schwarzmüller F, Vucic-Pestic O, Petchey OL  
632 (2012) Universal temperature and body-mass scaling of feeding rates. *Philosophical  
633 Transactions of the Royal Society B: Biological Sciences*, **367**, 2923–2934.

634 Real LA (1977) The Kinetics of Functional Response. *The American Naturalist*, **111**, 289–  
635 300.

636 Riede JO, Binzer A, Brose U, de Castro F, Curtsdotter A, Rall BC, Eklöf A (2011) Size-based  
637 food web characteristics govern the response to species extinctions. *Basic and Applied  
638 Ecology*, **12**, 581–589.

639 Ripley B (2016) tree: Classification and Regression Trees.

640 Savage VM, Gilloly JF, Brown JH, Charnov EL (2004) Effects of body size and temperature  
641 on population growth. *The American Naturalist*, **163**, 429–441.

642 Schmitz OJ, Price JR (2011) Convergence of trophic interaction strengths in grassland food  
643 webs through metabolic scaling of herbivore biomass. *Journal of Animal Ecology*, **80**,  
644 1330–1336.

645 Schneider FD, Scheu S, Brose U (2012) Body mass constraints on feeding rates determine the  
646 consequences of predator loss. *Ecology Letters*, **15**, 436–443.

647 Seifert LI, Weithoff G, Gaedke U, Vos M (2015) Warming-induced changes in predation,  
648 extinction and invasion in an ectotherm food web. *Oecologia*.

649 Sentis A, Hemptinne J-L, Brodeur J (2012) Using functional response modelling to  
650 investigate the effect of temperature on predator feeding rate and energetic efficiency.  
651 *Oecologia*, **169**, 1117–1125.

652 Sentis A, Hemptinne JL, Brodeur J (2014) Towards a mechanistic understanding of  
653 temperature and enrichment effects on species interaction strength, omnivory and food-  
654 web structure. *Ecology Letters*, **17**, 785–793.

655 Sentis A, Morisson J, Boukal DS (2015) Thermal acclimation modulates the impacts of  
656 temperature and enrichment on trophic interaction strengths and population dynamics.  
657 *Global Change Biology*, **21**, 3290–3298.

658 Somero GN (2010) The physiology of climate change: how potentials for acclimatization and  
659 genetic adaptation will determine “winners” and “losers”. *The Journal Of Experimental*  
660 *Biology*, **213**, 912–920.

661 Stan Development Team RStan: the R interface to Stan. Version 2.9.0. (2016).

662 Vasseur DA, McCann KS (2005) A mechanistic approach for modelling temperature-  
663 dependent consumer-resource dynamics. *The American Naturalist*, **166**, 184–198.

664 Vehtari A, Gelman A (2016) Practical Bayesian model evaluation using leave-one-out cross-  
665 validation and estimating out-of-sample pointwise predictive accuracy using posterior  
666 simulations.

667 Vucic-Pestic O, Ehnes RB, Rall BC, Brose U (2011) Warming up the system: higher predator  
668 feeding rates but lower energetic efficiencies. *Global Change Biology*, **17**, 1301–1310.

669 Wake DB, Vredenburg VT (2008) Colloquium paper: are we in the midst of the sixth mass  
670 extinction? A view from the world of amphibians. *PNAS*, **105**, 11466–11473.

671 Yodzis P, Innes S (1992) Body size and consumer-resource dynamics. *The American*  
672 *Naturalist*, **139**, 1151–1175.

673 Yoshida T, Jones LE, Ellner SP, Fussmann GF, Hairston NG (2003) Rapid evolution drives  
674 ecological dynamics in a predator-prey system. *Nature*, **424**, 303–306.

675 Yvon-Durocher G, Reiss J, Blanchard J et al. (2011) Across ecosystem comparisons of size  
676 structure: methods, approaches and prospects. *Oikos*, **120**, 550–563.

677 Zuber S, Carruthers F, Keel C et al. (2003) GacS sensor domains pertinent to the regulation of  
678 exoproduct formation and to the biocontrol potential of *Pseudomonas fluorescens*  
679 CHA0. *Molecular Plant-Microbe Interactions*, **16**, 634–644.
